# Supplementary material for: Synthesis, Characterization, and Encapsulation of Novel Plant Growth Regulators (PGRs) in Biopolymer Matrices
Source: Int J Mol Sci. 2021 Feb 12;22(4):1847. doi: 10.3390/ijms22041847 (PMC7918939; doi:10.3390/ijms22041847)
Supplement: Supplementary file 1 [file ijms-22-01847-s001.pdf]

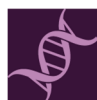

## Supporting Information

# Synthesis, Characterization and Encapsulation of Novel Plant Growth Regulators (PGRs) in Biopolymer Matrices

Kristina Vlahoviček-Kahlina <sup>1</sup>, Slaven Jurić <sup>1</sup>, Marijan Marijan <sup>1</sup>, Botagoz Mutaliyeva <sup>2</sup>, Svetlana Khalus <sup>3</sup>, Alexander Prosyanyk <sup>3</sup>, and Marko Vinceković <sup>1,\*</sup>

<sup>1</sup> University of Zagreb, Faculty of Agriculture, Department of Chemistry; Svetošimunska 25, 10000 Zagreb, Croatia; kvkahlina@agr.hr (K.V.-K.); sjuric@agr.hr (S.J.); marijan.marijan1986@gmail.com (M.M.); mvincekovic@agr.hr (M.V.)

<sup>2</sup> Biotechnology Department, M. Auezov South-Kazakhstan University, Shymkent, pr. Tauke-Khan; mbota@list.ru (B.M)

<sup>3</sup> Ukrainian State University of Chemical Technology, Gagarina av., Dnipro, Ukraine; swetasnegur9@gmail.com (S.V.K), prosyanykav@gmail.com (A.V.P)

\* Correspondence: mvincekovic@agr.hr ; Tel: + 385 1 239 3953

**Keywords:** biopolymeric microcapsules; encapsulation; dehydroamino acids derivatives; plant growth regulators; agriculture

## Table of Content

### Methods:

|                                                           |      |
|-----------------------------------------------------------|------|
| Testing of plant growth-regulating activity               | SI-2 |
| Testing of auxin- and gibberellin-like activities         | SI-2 |
| Toxicity determination                                    | SI-2 |
| Field trials                                              | SI-2 |
| Meteorological conditions of research during field trials | SI-2 |
| Fourier transform infrared spectroscopy and NMR analysis  | SI-4 |

### Results and discussion:

|                                                                          |      |
|--------------------------------------------------------------------------|------|
| Field trials                                                             | SI-4 |
| Molecular interactions between constituents in microcapsule formulations | SI-6 |
| NMR and C/H/N Elemental analysis                                         | SI-9 |

## Methods:

**Testing of plant growth-regulating activity.** Laboratory tests of the sowing properties of corn (sort Odessa 100), barley (sort Zernogradsky), winter wheat (sort Fedorovka) seeds were carried out by the method of germination in Petri dishes on filter paper [1]. Seeds were germinated in enamines aqueous solutions at concentrations 0.01, 0.001 and 0.0001 % (w/v). During germination, the following regimes were maintained: for corn 25 °C, barley 20 °C, winter wheat 20 °C. 50 pcs of barley and winter wheat seeds and 30 pcs of corn seeds were placed in each germinator. Before seed hatching, the seedlings were covered with dark paper, and then germinated during the photoperiod night: day 8:16 and temperature 22–24 °C. Plant analysis was performed on the 14th day. The repetition of the experiment was fourfold.

Seed cultivation was carried out in 500 ml chemical glasses with agar-agar. Initially, a minimal amount of water was poured into the glass to avoid dilution, and then water was added to the initial mark. For the first six days, the seeds were in complete darkness at a temperature of 22 °C. Then the growth took place at a photoperiod of 6:18. Biometric analysis of plants was carried out on day 14.

**Testing of auxin- and gibberellin-like activities.** A simple and reliable method for determining the auxin-like activity of any compounds is the method of direct growth of segments of coleoptiles of etiolated seedlings of oats, wheat or corn with fertilized top. The coleoptile of cereal plants is very sensitive to exogenous indole-3-acetic acid (IAA), and therefore it is a classic object for biological tests for auxin. The increase in the length of the segment after 24 h in the dark was taken as a measure of auxin-like activity. Deionized water and IAA (5 mg dm<sup>-3</sup>) were used as controls. The growth rate of oat coleoptiles correlates well with the level of diffuse IAA [2]. This test is practically insensitive to gibberellins and cytokinins [3].

As a highly specific test for gibberellin, either cuts of four-day-old corn seedlings with a coleoptile knot [4] or dwarf pea seedlings [5] are used. These segments were placed in Petri dishes with the test solutions and incubated for 48 or 72 hours in a dark thermostat at 26 °C. The gibberellic acid solution was used as a standard. The growth of the first leaf protruding above the cylinder of the coleoptile was measured.

**Toxicity determination.** Toxicity during intragastric exposure was determined after the method of Sanotykiy, 2013 [6]. Average lethal doses (LD<sub>50</sub>) for intragastric intake were established in sexually mature animals: rats - males weighing 180–240 g, female rats weighing 180–220 g, mice - males weighing 18–22 g. The substance was injected in its native form intragastrically on an empty stomach using a metal probe in compliance with the relevant rules. In total, 80 rats and 30 mice were used in the experiments.

The values of the administered doses ranged from 2000 to 8000 mg kg<sup>-1</sup>. The obtained LD<sub>50</sub> values for male and female rats were 5163 ± 811 and 6282 ± 420 ml kg<sup>-1</sup>, respectively. The intragastric administration of PGR1 to white mice showed the LD<sub>50</sub> value was 5350 ± 737 mg kg<sup>-1</sup>.

**Field trials.** A day before sowing 1 ton of corn, barley or wheat seeds were treated with 0.001% of an aqueous solution of PGR1 (20 L) and dried. Seeds treated with water served as control. The area of the plot was 10 m<sup>2</sup>.

In the absence of pre-sowing treatment, an aqueous solution of PGR1 was sprayed on vegetative plants at the end of the harvest stage – the beginning of flowering with at a rate of 200 L ha<sup>-1</sup> on barely (sort Prariya), oats (sort Skakun) and Spalchik rice.

**Meteorological conditions of research during field trials.** Meteorological characteristics based on observations at the Nikopol weather station (2018) are presented in Tables S1 and S2.

**Table S1.** Statistics of meteorological characteristics based on observations at the Nikopol weather station during 2018.

| Indicators                  | Average<br>$\pm$ statist.error | Median  | Minimum | Maximum | CV (%) |
|-----------------------------|--------------------------------|---------|---------|---------|--------|
| Precipitation (mm)          | 0.90 $\pm$ 0.15                | 0.00    | 0.00    | 18.00   | 308.39 |
| Wind speed (m/s)            | 2.28 $\pm$ 0.07                | 2.00    | 0.00    | 8.86    | 59.77  |
| Temperature ( $^{\circ}$ C) | 10.89 $\pm$ 0.56               | 10.93   | −17.72  | 30.28   | 97.96  |
| $T_{min}$ ( $^{\circ}$ C)   | 6.47 $\pm$ 0.49                | 5.80    | −21.30  | 22.20   | 146.02 |
| $T_{max}$ ( $^{\circ}$ C)   | 15.17 $\pm$ 0.62               | 16.00   | −15.10  | 37.80   | 78.51  |
| Relative humidity (%)       | 69.12 $\pm$ 0.91               | 69.57   | 27.75   | 100.00  | 25.08  |
| Atmospheric pressure (hPa)  | 1014.67 $\pm$ 0.40             | 1014.13 | 992.55  | 1047.33 | 0.75   |

**Table S2.** Monthly distribution of precipitation, average wind speeds, air humidity and atmospheric pressure during 2018.

| Month     | Precipitation<br>(mm) | Average wind<br>speeds (m/s) | Air humidity (%) | Atmospheric pressure (hPa) |
|-----------|-----------------------|------------------------------|------------------|----------------------------|
| January   | 21.40                 | 3.59                         | 78.60            | 1022.8                     |
| February  | 5.20                  | 2.45                         | 84.23            | 1022.3                     |
| March     | 7.40                  | 3.50                         | 61.91            | 1015.2                     |
| April     | 36.40                 | 2.37                         | 65.97            | 1015.4                     |
| May       | 47.20                 | 2.00                         | 68.94            | 1013.5                     |
| June      | 64.30                 | 2.37                         | 63.28            | 1012.1                     |
| July      | 10.20                 | 2.42                         | 53.96            | 1011.9                     |
| August    | 16.80                 | 1.30                         | 51.99            | 1006.3                     |
| September | 31.00                 | 2.09                         | 56.23            | 1010.1                     |
| October   | 26.70                 | 1.78                         | 72.64            | 1015.9                     |
| November  | 15.60                 | 1.65                         | 83.14            | 1017.9                     |
| December  | 46.70                 | 1.84                         | 89.91            | 1013.0                     |
| Total     | 328.90                | 2.28                         | 69.23            | 1014.7                     |

Precipitation on the territory during all time were falling extremely unevenly. In 2018, the duration of the period without precipitation made up 264 days. The maximum daily amount of precipitation varied within 16–18 mm (Table S1). The intensity of precipitation varied throughout the year. The greatest amount of precipitation in the growing season was observed in June, and the least - in August (Table S2). Annual precipitation was mainly due to intense precipitation in April–June 149.7 (45.5% per annum).

The average annual temperature made up  $10.89 \pm 0.56$  °C. The temperature range for the study period made up from -21.3 to +37.8 °C. The minimum temperatures were observed in January–February, and the maximum in July–August. The greatest temperature fluctuations were observed in winter or spring. The autumn period is usually marked by a sharp and distinct drop in temperatures.

The winds were predominantly east and north-east.

The highest value of the average atmospheric pressure was observed in January–February, after which the pressure in March dropped rather sharply and reached a minimum in August.

**Fourier transform infrared spectroscopy and NMR analysis.** The Fourier transform infrared spectroscopy (FTIR) spectra were recorded with the FTIR Instrument - Cary 660 FTIR (MIR system) spectrometer (Agilent Technologies, USA). Single samples of alginate, calcium chloride and enamines (PGR1, PGR2 and PGR3) and their mixtures were analyzed. Spectral scanning was done in the range of 400–4000  $\text{cm}^{-1}$ .

$^1\text{H}$  NMR spectra of enamines were recorded on a Varian VXP-300 spectrometer (300 MHz, internal standard -  $\text{Me}_4\text{Si}$ ), chemical shifts in  $\delta$ -scale (ppm), coupling constants in Hz). Mass spectra were recorded on a VG-70EQ 770 mass spectrometer in FAB mode (FAB) and on Kratos MS 890 mass spectrometer electron impact mode (EI) and chemical ionization mode (CI), gas-reagent isobutane.

## Results and discussion:

### Field trials

**Table S3.** The influence of PGR1 (2,3-dehydroaspartic acid dimethyl ester) on winter wheat productivity

| Variant | Concentration (%) | Productivity, t/ha (% to control ) |           |         |           |             |         |              |
|---------|-------------------|------------------------------------|-----------|---------|-----------|-------------|---------|--------------|
|         |                   | Soft wheat                         |           |         |           | Durum wheat |         |              |
|         |                   | Albatros                           | Skifyanka | Yuna    | Kristal-2 | Korund      | Yasma   | L.921H9<br>9 |
| Control | Water             | 4.25                               | 8.01      | 9.77    | 5.19      | 7.53        | 5.66    | 8.48         |
| IAA     | 0.01              | 4.37 <sup>a</sup>                  | 8.32      | 8.15    | 6.72      | 7.46        | 5.34    | 7.74         |
|         |                   | (102.8)                            | (103.9)   | (83.4)  | (129.5)   | (99.1)      | (94.3)  | (91.3)       |
| PGR1    | 0.001             | 4.70                               | 10.36     | 10.82   | 6.11      | 8.34        | 7.41    | 9.90         |
|         |                   | (110.6)                            | (129.3)   | (110.7) | (117.7)   | (110.7)     | (130.9) | (116.7)      |

<sup>a</sup>Humate, 2.5 %

**Table S4.** The influence of PGR1 (2,3-dehydroaspartic acid dimethyl ester) on barley productivity

| Variant | Concentration (%) | Productivity, t/ha (% to control) |             |            |               |             |
|---------|-------------------|-----------------------------------|-------------|------------|---------------|-------------|
|         |                   | Spring barley                     |             |            | Winter barley |             |
|         |                   | Zernogradsky                      | Preriya     | Nutans 518 | Pallidum1 07  | Siluet      |
| Control | Water             | 3.75                              | 3.28        | 4.50       | 6.05          | 4.03        |
| Humate  | 2.5               | 3.67(97)                          | 3.47(105.8) | 4.6(102)   | 6.34(105)     | 4.06(101)   |
| PGR1    | 0.001             | 4.12(110) <sup>a</sup>            | 3.49(106.4) | 5.00(111)  | 7.20(119)     | 4.53(112.4) |

<sup>a</sup> 0.01%**Table S5.** The influence of PGR1 (2,3-dehydroaspartic acid dimethyl ester) on the productivity of winter wheat after artificial infection with Fusarias

| Variant | Concentration (%) | Productivity, t/ha (%) |           |              |          |
|---------|-------------------|------------------------|-----------|--------------|----------|
|         |                   | Fedorovka              | Peresvet  | Yubileyny 75 | Briz     |
| Control | Water             | 4.5                    | 4.39      | 4.7          | 5.05     |
| PGR1    | 0.0001            | 4.75(106)              | 5.55(126) | 5.6(119)     | 5.1(101) |

**Table S6.** The influence of PGR1 (2,3-dehydroaspartic acid dimethyl ester) on potato productivity.

| Variant | Concentration (%) | Productivity, t/ha (%) |             |           |           |           |           |
|---------|-------------------|------------------------|-------------|-----------|-----------|-----------|-----------|
|         |                   | Belorusskiy            | Gatchinskiy | Lugovskoy | Polet     | Temp      | Nevskiy   |
| Control |                   | 9.0                    | 23.6        | 26.3      | 18.5      | 27.8      | 29.5      |
| PGR1    | 0.001             | 9.7(107.8)             | 24.2(102.5) | 30.5(108) | 19.2(104) | 30.6(110) | 31(105)   |
| PGR1    | 0.0001            | 12.2(135.5)            | 29.0(122.9) | 34.9(122) | 24.0(129) | 33.7(121) | 31.6(107) |

**Table S7.** The effect of PGR1 (2,3-dehydroaspartic acid dimethyl ester) on the productivity and content of tubers of potato sort Nevskiy.

| Variant | Concentration (%) | Tuber content  |           |                 |           | Productivity |       |
|---------|-------------------|----------------|-----------|-----------------|-----------|--------------|-------|
|         |                   | nitrate, mg/kg | starch, % | vitamin C, mg % | solids, % | t/ha         | %     |
| Control | -                 | 180.4          | 12.7      | 21.3            | 18.4      | 29.51        | 100   |
| PGR1    | 0.01              | 121.2          | 13.8      | 23.4            | 19.5      | 33.14        | 112.8 |
| PGR1    | 0.001             | 130            | 13.2      | 22.7            | 19.0      | 31.58        | 107.0 |

**Table S8.** The effect of presowing treatment with PGR1 (2,3-dehydroaspartic acid dimethyl ester) on diseases potato sort Temp.

| Variant | Concentration (%) | Plant disease (%)         |                |                |                          |                        |
|---------|-------------------|---------------------------|----------------|----------------|--------------------------|------------------------|
|         |                   | During the growing season |                | During storage |                          |                        |
|         |                   | bacteriosis               | viral diseases | late blight    | late blight-fusarium rot | late blight-rubber rot |
| Control | Water             | 1.1                       | 1.1            | 0              | 0.8                      | 2.2                    |
| PGR1    | 0.0001            | 0.2                       | 0.6            | 0.9            | 0                        | 0.9                    |
| PGR1    | 0.001             | 0.2                       | 0.8            | 0              | 0                        | 0.4                    |

### Molecular interactions between constituents in microcapsule formulations

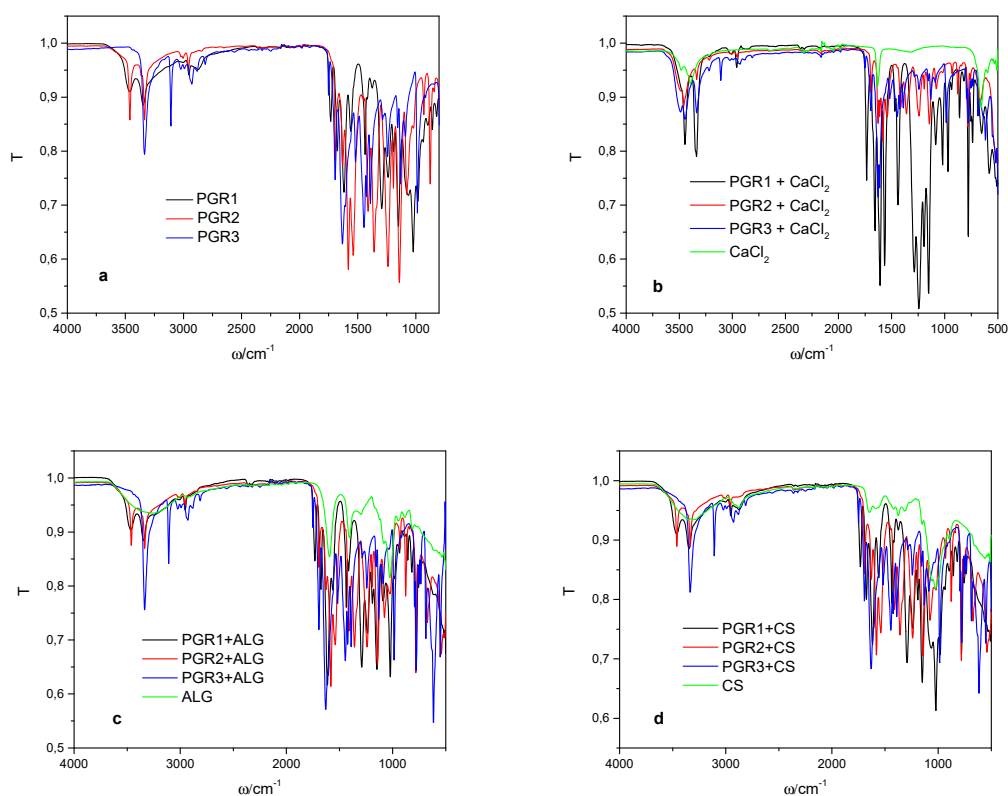**Figure S1.** FTIR spectrum of (a) PGR1 (black line), PGR2 (red line) and PGR3 (blue line), (b) mixtures with CaCl<sub>2</sub>, (c) mixtures with ALG (black line), (d) mixtures with CS. Added spectra of CaCl<sub>2</sub> alginate (ALG) and chitosan (CS) are denoted with green lines.

Information on molecular interactions between enamines, calcium chloride, chitosan and sodium alginate in mixtures was obtained using FTIR. Spectra of single enamines and spectrum of their mixtures with calcium chloride, alginate or

chitosan are presented in Figure S1a and S1b,c,d, respectively. Experimental vibrational frequencies and band assignments of enamines are listed in Table S9.

Spectra of PGR1 and PGR2 exhibit the spectral characteristics for aliphatic amines and spectrum of PGR3 for secondary and tertiary amines. Both, PGR1 and PGR2 spectra show the N-H stretching in the range of 3300–3000  $\text{cm}^{-1}$  with two bands corresponding to asymmetric (higher frequency) and symmetric N-H stretching of primary amines. These bands are weaker and sharper than those alcoholic O-H stretching occurring in the same region. All characteristic peaks of PGR1 are relatively less intense than those of PGR2. PGR3 exhibits a sharp peak corresponding to secondary amine at 3332  $\text{cm}^{-1}$ , and peaks characteristic for tertiary amine at 1240 and 1150  $\text{cm}^{-1}$ .

Analysis of single calcium chloride, sodium alginate and chitosan spectra are previously reported [7]. The characteristic peaks in the calcium chloride spectrum are at 3494, 3396, 3214, 1646, 663  $\text{cm}^{-1}$ . The frequency range 3214–3494  $\text{cm}^{-1}$  and the medium intensity band at 1646  $\text{cm}^{-1}$  represent the bending forms of hydroxyl groups. The medium intensity peak at 663  $\text{cm}^{-1}$  represents the stretching of the Ca-O bond.

Analyses of sodium alginate and chitosan FTIR spectra were in correlation with literature data [8]. Characteristic vibration of sodium alginate spectrum is strong and broad absorption band in the range 3000–3600  $\text{cm}^{-1}$  (O-H group), stretching vibration at 2920  $\text{cm}^{-1}$  (the aliphatic C-H group), the bands at 1595 and 1405  $\text{cm}^{-1}$  (asymmetric and symmetric stretching peaks of carboxylate ( $-\text{COO}^-$ ) groups), weak broad stretching vibration at 1295  $\text{cm}^{-1}$  (skeletal vibrations), and bands from 1081 to 1026  $\text{cm}^{-1}$  (antisymmetric stretching (C-O-C)).

Chitosan spectrum exhibits the strong and broad absorption band around 3330  $\text{cm}^{-1}$  (O-H and -N-H stretching), stretching vibrations at 2925  $\text{cm}^{-1}$  and 2875  $\text{cm}^{-1}$  (asymmetric and symmetric modes of C-H), absorption band at 1648  $\text{cm}^{-1}$  (amide I band), the bending vibrations at 1582  $\text{cm}^{-1}$  (N-H stretching of N-from amine and amide II), band at 1425  $\text{cm}^{-1}$  ( $\text{CH}_2$  scissoring), medium peak at 1373  $\text{cm}^{-1}$  (symmetrical  $\text{CH}_3$  deformation), whereas vibrations in the 1190–920  $\text{cm}^{-1}$  region represent C-N stretching vibration and overlap of the vibrations from the carbohydrate ring.

The FTIR spectra of a mixture of calcium chloride and enamines show differences in the position and intensity of the bands in comparison with single components due to enhanced hydrogen bonds and electrostatic interaction between calcium and amino groups (Figure 1b). The spectra with PGR1 show relatively higher intensity in comparison with spectra of PGR2 in the region of asymmetrical and symmetrical N-H stretching and N-H bend. There is the propagation of bands in the range of the wavenumbers from 3600 to 3200  $\text{cm}^{-1}$  for mixtures with PGR1 and PGR2. There is a change in the position, shape and intensity of the bands corresponding to the primary amines: the bands move toward lower values of wave numbers: from 3473 to 3469  $\text{cm}^{-1}$ , 3347 to 3334  $\text{cm}^{-1}$ , 2960 to 2953  $\text{cm}^{-1}$ , 1680 to 1653  $\text{cm}^{-1}$ , 1617 to 1604  $\text{cm}^{-1}$ , 1562 to 1568  $\text{cm}^{-1}$ . The following bands also change: from 1238 to 1245  $\text{cm}^{-1}$ , 1187 to 1192  $\text{cm}^{-1}$ , 1148 to 1152  $\text{cm}^{-1}$ , 1020 to 1018  $\text{cm}^{-1}$ , 778 to 776  $\text{cm}^{-1}$ . Changes in the position and relative intensities can be explained by the coordination and formation of bonds between calcium ions and the amino group, creating a  $\text{Ca}(\text{NH}_3)_n\text{Cl}_2$  type complex [9].

Spectra of enamines and ALG mixture presented in Figure 1c shows enhanced stretching vibrations in the range of the asymmetric and symmetric N-H stretching of primary amines (PGR1 and PGR2) and N-H stretching at 3288  $\text{cm}^{-1}$  of secondary amine (PGR3). These changes can be explained by the enhanced hydrogen bonding. All other bands indicate the presence of amino groups, and the interactions are evident in the intensity decrease of bands. Enhanced intensities and shifting of bands corresponding to asymmetric and symmetric carboxyl groups ( $\text{COO}^-$ ) higher wavenumbers observed for all samples indicated interactions with N-H groups. Changes in the position and intensity of the bands corresponding to the C=C and C-N stretching and as well as N-H wag occur.

Spectra of enamines with chitosan exhibit almost no shifting of characteristic bands but all characteristic peak intensities are enhanced due to reaction between the amino group of dimethyl esters of amino fumaric acid and the -OH group of chitosan as a result of different dipole moments of the groups, and the formation of saturated amides (Figure 1d). The peak intensities increase is significant in the PGR1 spectrum and much smaller in the PGR2 and PGR3 spectra.

FTIR analyses revealed complex interactions between enamines in mixtures with calcium chloride, sodium alginate or chitosan due to electrostatic interactions and strong hydrogen bonding.

**Table S9.** Experimental vibrational frequencies and band assignments for PGR1 (2,3-dehydroaspartic acid dimethyl ester), PGR2 (Z-isomer of the potassium salt of 2-amino-3-methoxycarbonylacrylic acid), and PGR3 (1-methyl-3-ethyl-amino imide of maleic acid).

| Frequency/cm <sup>-1</sup> | Comments                                               |
|----------------------------|--------------------------------------------------------|
| <b>PGR1</b>                |                                                        |
| 3600-3300                  | N-H stretching (primary amines)                        |
| 3471                       | asymmetrical N-H stretching                            |
| 3346                       | symmetrical N-H stretching                             |
| 1700                       | C=O stretching                                         |
| 1670 and 1616              | N-H bend (primary amines)                              |
| 1438                       | C=C                                                    |
| 1281                       | C-N stretching                                         |
| 1250 and 1190              | C-N stretching (aliphatic amines)                      |
| 910-665                    | N-H wag (primary amines)                               |
| <b>PGR2</b>                |                                                        |
| 3600-3300                  | N-H stretching of primary amines (appear as two peaks) |
| 3473                       | asymmetrical N-H stretching                            |
| 3347                       | symmetrical N-H stretching                             |
| 1700                       | C=O stretching                                         |
| 1629 and 1580              | N-H bend (primary amines)                              |
| 1530                       | C=C stretching                                         |
| 1408                       | C-C stretching                                         |
| 1240 and 1193              | C-N stretching (aliphatic amines)                      |
| 910-665                    | N-H wag (primary amines)                               |
| <b>PGR3</b>                |                                                        |
| 3288                       | N-H stretching (secondary amine)                       |
| 1700                       | C=O stretching                                         |
| 1650                       | N-H bend (secondary amines)                            |
| 1438                       | C=C                                                    |
| 1240 and 1150              | C-N (tertiary amines)                                  |
| 1190 and 1130              | N-H bend, C-N stretching (secondary amines)            |
| 1143                       | C-N stretching                                         |
| 763                        | N-H wag (secondary amines)                             |

## NMR and C/H/N Elemental analysis

**Table S10.** (A)  $^1\text{H}$  NMR data of enamines (PGR1, 2,3-dehydroaspartic acid dimethyl ester), PGR2 (Z-isomer of the potassium salt of 2-amino-3-methoxycarbonylacrylic acid), and PGR3, 1-methyl-3-ethyl-amino imide of maleic acid) and (B) C/H/N Elemental analysis.

| (A) $^1\text{H}$ NMR ( 200 MHz, 25 °C) |                              |                                             |                              |                                      |                               |
|----------------------------------------|------------------------------|---------------------------------------------|------------------------------|--------------------------------------|-------------------------------|
| PGR1<br>( $\text{CDCl}_3$ from HMDS)   |                              | PGR2<br>( $\text{CD}_3\text{OD}$ from HMDS) |                              | PAGR3<br>( $\text{CDCl}_3$ from TMS) |                               |
| $\delta$ / ppm                         | ASSIGNMENT                   | $\delta$ / ppm                              | ASSIGNMENT                   | $\delta$ / ppm                       | ASSIGNMENT                    |
| 3.72                                   | 3H, s, $\text{CH}_3\text{O}$ | 3.62                                        | 3H, s, $\text{CH}_3\text{O}$ | 2.91                                 | 3H, d, $\text{CH}_3\text{NH}$ |
| 3.87                                   | 3H, s, $\text{CH}_3\text{O}$ | 4.92                                        | 1H, s, CH                    | 2.95                                 | 3H, s, $\text{CH}_3\text{N}$  |
| 5.51                                   | 1H, s, CH                    |                                             |                              | 4.80                                 | 1H, s, CH                     |
| 5.93                                   | 1H, s, NH                    |                                             |                              |                                      |                               |
| 7.76                                   | 1H, s, NH                    |                                             |                              |                                      |                               |

|   | (B) C/H/N Elemental analysis                        |              |                                                      |              |                                                                   |              |
|---|-----------------------------------------------------|--------------|------------------------------------------------------|--------------|-------------------------------------------------------------------|--------------|
|   | PGR1: C <sub>6</sub> H <sub>9</sub> NO <sub>4</sub> |              | PGR2: C <sub>5</sub> H <sub>6</sub> KNO <sub>4</sub> |              | PGR3: C <sub>6</sub> H <sub>8</sub> N <sub>2</sub> O <sub>2</sub> |              |
|   | FOUND %                                             | CALCULATED % | FOUND %                                              | CALCULATED % | FOUND %                                                           | CALCULATED % |
| C | 45.42                                               | 45.28        | 32.96                                                | 32.78        | 51.69                                                             | 51.42        |
| H | 5.53                                                | 5.70         | 3.06                                                 | 3.30         | 5.37                                                              | 5.75         |
| N | 8.74                                                | 8.80         | 7.33                                                 | 7.65         | 19.99                                                             | 19.99        |

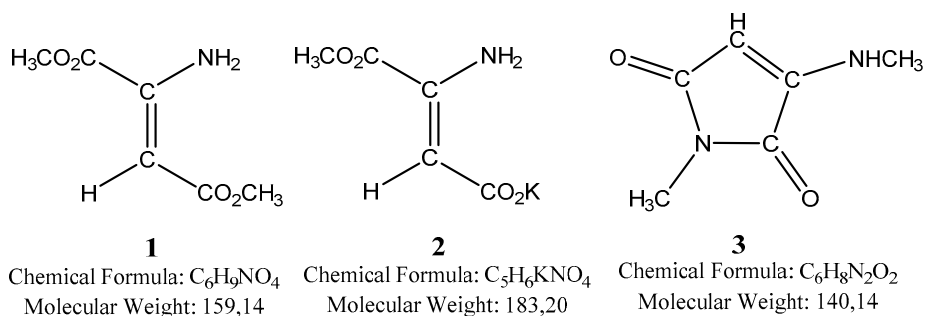

## References

- Khokhlova, T.V.; Chertikhina, Y.A.; Mutaliyeva, B.Z.; Kudasova, D.E.; Yanova, K.V. Aminofimarinic acid derivatives: synthesis and influence on plant development. *Vopr. Khim. Khim. Tekhnol.* **2018**, *6*, 91–98.
- Weiler, E.W.; Jourdan, P.S.; Conrad, W. Levels of indole-3-acetic acid in intact and decapitated coleoptiles as determined by a specific and highly sensitive solid-phase enzyme immunoassay. *Planta* **1981**, *153*, 561–571, doi:10.1007/BF00385542.
- Kepheli, V.I.; Turetskaya, R.X.; Koph, E.P.; Vlasov, P.V. Determination of the biological activity of free auxins and growth inhibitors in plant material: Methods for the determination of phytohormones, growth inhibitors,

defoliant and herbicides. *M. Sci.* **1973**, 7–21.

4. Boyarkin, A.M.; Dmitriyeva, M.I. Methods for the determination of growth regulators and herbicides. *M. Sci.* **1966**, 12–23.
5. Lozhnikov, V.N.; Khlopenkova, L.P.; Chailyakhyan, M.X. Determination of natural hiberlins in plant tissues: Methods for the determination of phytohormones, growth inhibitors, defoliant and herbicides. *M. Sci.* **1973**, 50–58.
6. Sanotskiy, I.V. *Methods for determining the toxicity and hazard of chemicals*; 2013;
7. Stage, R.B.; Stanley, J.B.; Moseley, P.B. Determination of primary and secondary fatty aliphatic amines in the presence of large amounts of nitrile by near-infrared spectroscopy. *J. Am. Oil Chem. Soc.* **1972**, 49, 87–89, doi:10.1007/BF02612632.
8. Jurić, S.; Dermić, E.; Topolovec-Pintarić, S.; Bedek, M.; Vinceković, M. Physicochemical properties and release characteristics of calcium alginate microspheres loaded with *Trichoderma viride* spores. *J. Integr. Agric.* **2019**, 18, 2534–2548, doi:10.1016/S2095-3119(19)62634-1.
9. Schmidt, J.; Marcovitch, O.; Lubezky, A.; Kozirovski, Y.; Folman, M. IR and FIR spectra of ammonia adsorbed on calcium chloride and bromide: Evidence for complex formation. *J. Colloid Interface Sci.* **1980**, 75, 85–94, doi:10.1016/0021-9797(80)90352-5.
